# Supplementary material for: Low Grade Micropapillary Urothelial Carcinoma, Does It Exist? - Analysis of Management and Outcomes from the Surveillance, Epidemiology and End Results (SEER) Database
Source: PubMed Central journal article supplement — J Cancer. 2013 May 6;4(4):336–42. doi: 10.7150/jca.6215 (PMC3654490; doi:10.7150/jca.6215), 2013-05-06

Supplemental Figure 1:

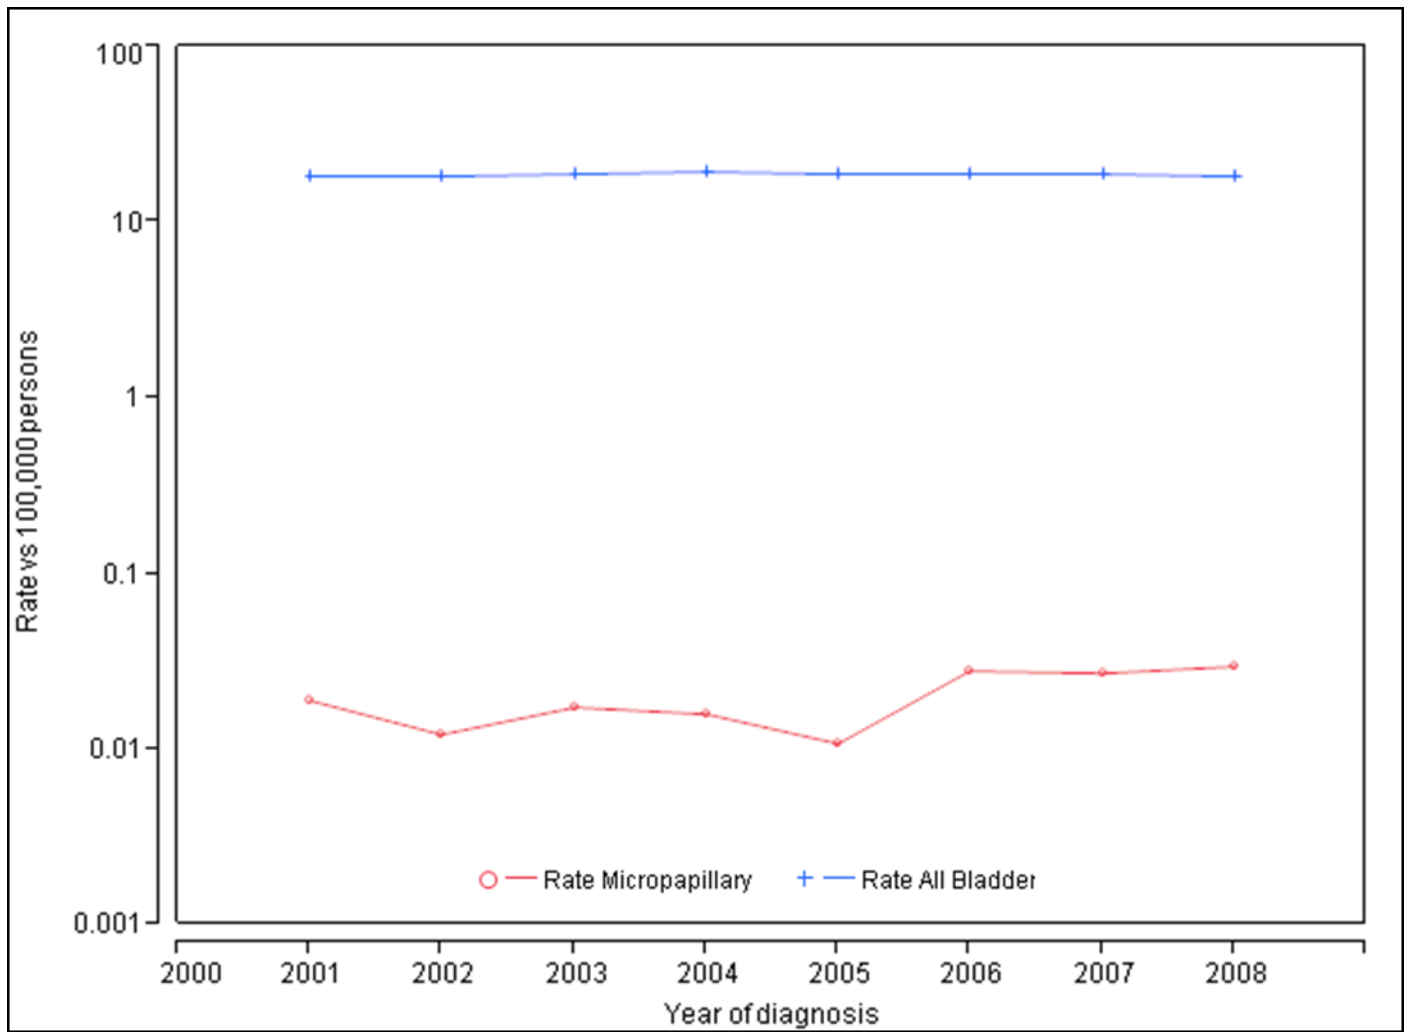

Supplemental Figure 2:

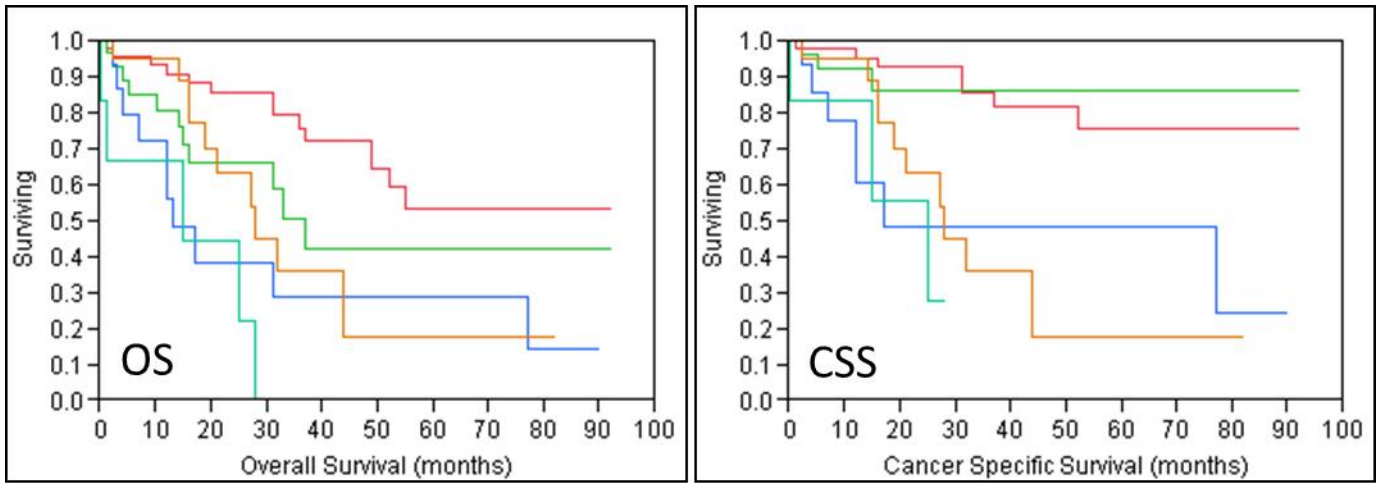

| Stage                          | Median OS (months) | Median CSS (months) |
|--------------------------------|--------------------|---------------------|
| Nonmuscle invasive (Ta/T1/Tis) | DNR                | DNR                 |
| Muscle invasive (T2)           | 37                 | DNR                 |
| Locally advanced (T3/T4)       | 13                 | 17                  |
| Nodal disease (N+)             | 28                 | 28                  |
| Metastatic (M1)                | 15                 | 25                  |

- 1 - Ta/T1/Tis (N0M0) — red line
- 2 - T2 (N0M0) — green line
- 3 - T3/T4 (N0M0) — blue line
- 4 - N+M0 — orange line
- 5 - M1 — cyan line

Supplemental Figure 3:

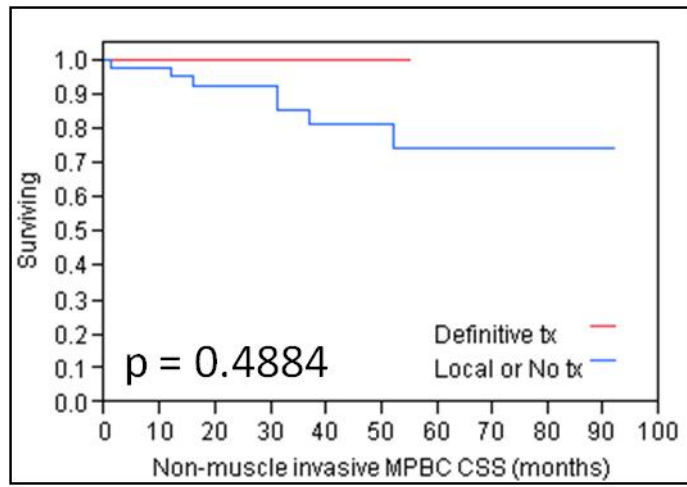

Supplement: jcav04p0336s1.pdf [file jcav04p0336s1.pdf]
